# Supplementary material
Source: MDPI journal article supplement (https://www.mdpi.com/2313-5778/2/3/29)
Supplement: s1 [file s1]

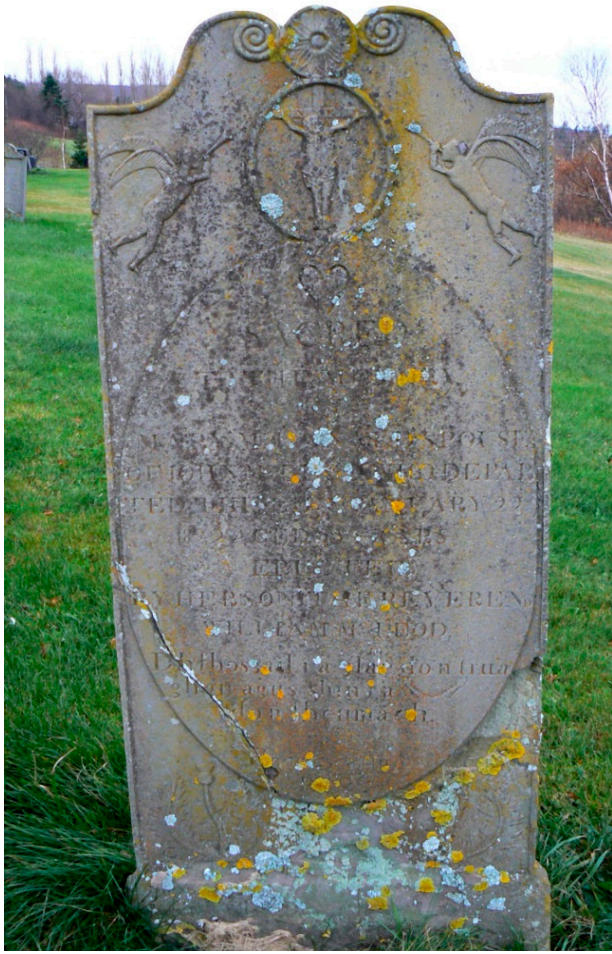

Figure 1 [Credit: Marleen Hubley-MacDonald]

Sacred to the Memory of  
 Mary McDonald  
 Spouse of  
 John McLeod  
 Who departed this life  
 January 22, 1829  
 Aged 55 yrs  
 Erected by her son  
 Reverend William McLeod  
 Dh fhosgail i a glac do n trua[-]  
 ghan agus shin i a [làmh] do n fheumach.  
 [She opened her hand to the poor, and  
 she stretched out her arms to the needy.  
 (Proverbs 31:20)]  
 St. Margaret of Scotland Cemetery  
 Arisaig, Antigonish County

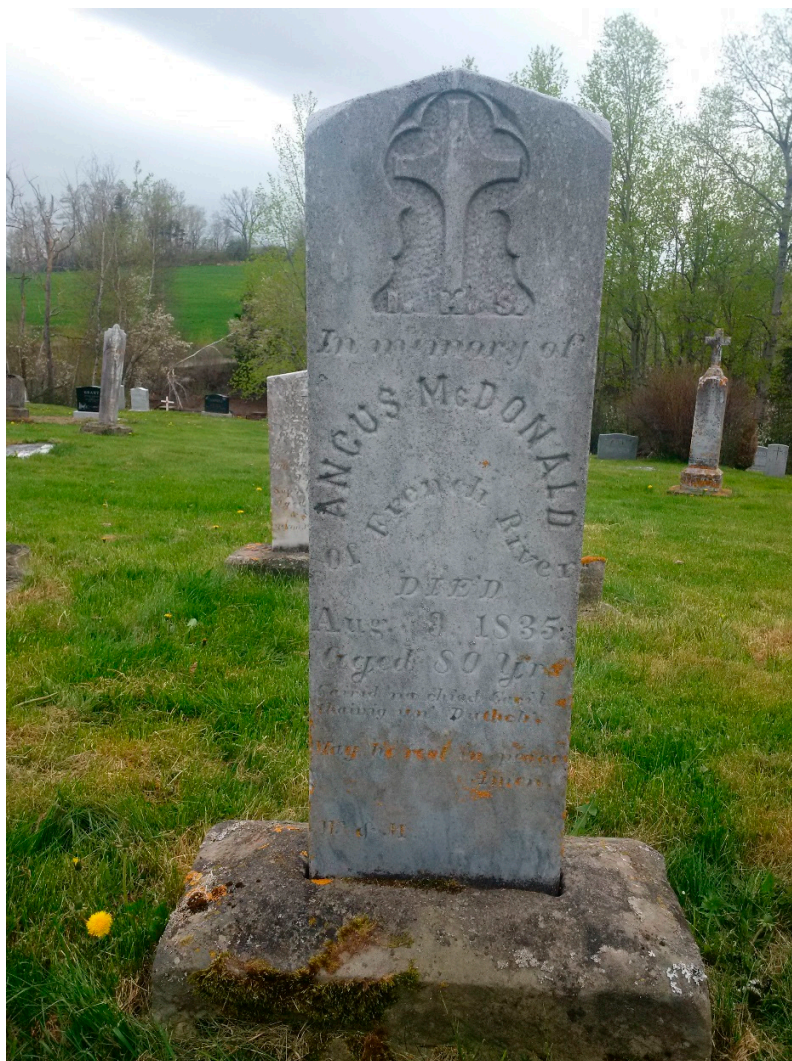

Figure 2

In memory of  
 ANGUS McDONALD  
 OF French River  
 DIED  
 Aug. 9 1835.  
 Aged 80 yrs  
*Cairid na chiad Gaeil a*  
*Thainig un' Duthch'.*  
 [A friend of the first  
 Gaels/Highlanders who came to  
 the country.]  
 May he rest in peace.  
 Amen.  
 St. Andrews Cemetery  
 Egerton, Pictou County



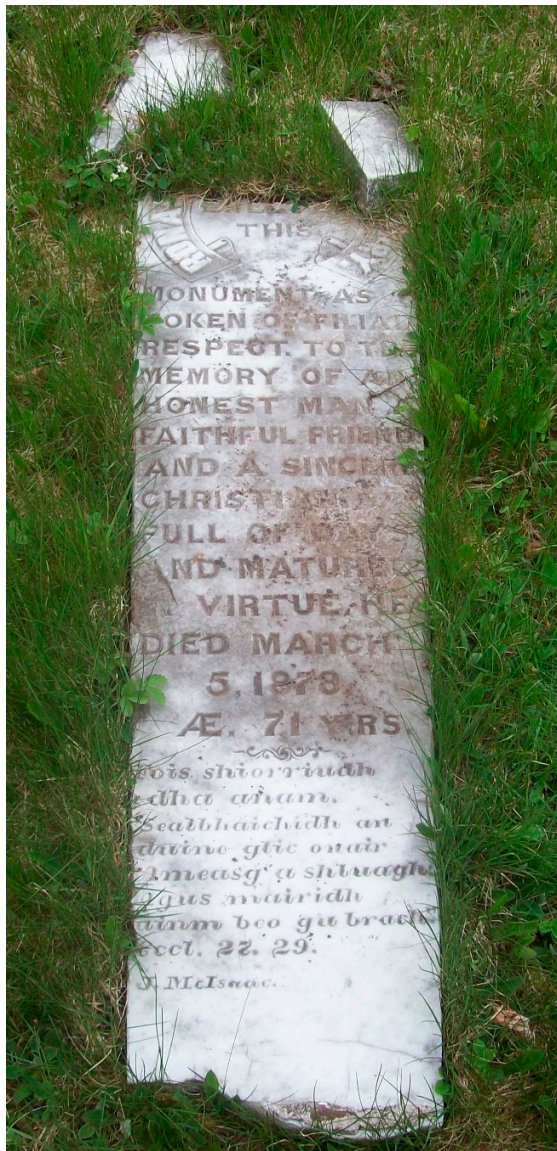

Figure 3

RONALD [illegible] RORY  
THIS

MONUMENT AS  
TOKEN OF FILIAL  
RESPECT. TO THE  
MEMORY OF AN  
HONEST MAN A  
FAITHFUL FRIEND  
AND A SINCERE  
CHRISTIAN  
FULL OF DAYS  
AND MATURE  
VIRTUE. HE  
DIED MARCH

5, 1878

AE. 71 YRS.

*Fois Shiorriudh [sic]  
dha anam.*

*"Sealbhaichidh an  
duine glic onair  
A measg a shluagh  
Agus mairidh  
ainm beo gu brach".*

Eccl. 27[sic].29 [Ecclesiasticus  
37:29]

[Eternal Peace to His Soul.

"A wise man shall inherit  
honour among his people,  
and his name shall live for  
ever."]

St. Joseph's Cemetery

St. Joseph's, Antigonish County

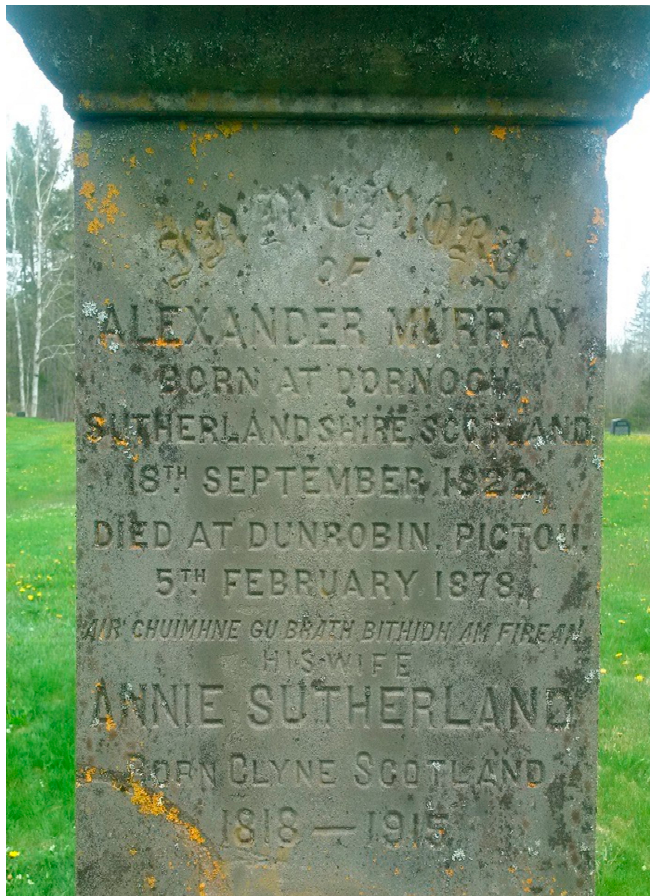

Figure 4

IN MEMORY  
OF  
ALEXANDER MURRAY  
BORN AT DORNOCH  
SUTHERLANDSHIRE, SCOTLAND  
18<sup>TH</sup> SEPTEMBER 1822  
DIED AT DUNROBIN. PICTOU.  
5<sup>TH</sup> FEBRUARY 1878.  
*AIR CHUIMHNE GU BRATH BITHIDH AM  
FIREAN*  
[Psalms 112:6]  
[The righteous man will be remembered  
forever.]  
HIS WIFE  
ANNIE SUTHERLAND  
BORN CLYNE SCOTLAND  
1818-1915

Gladstone Cemetery  
Four Mile Brook, Pictou County



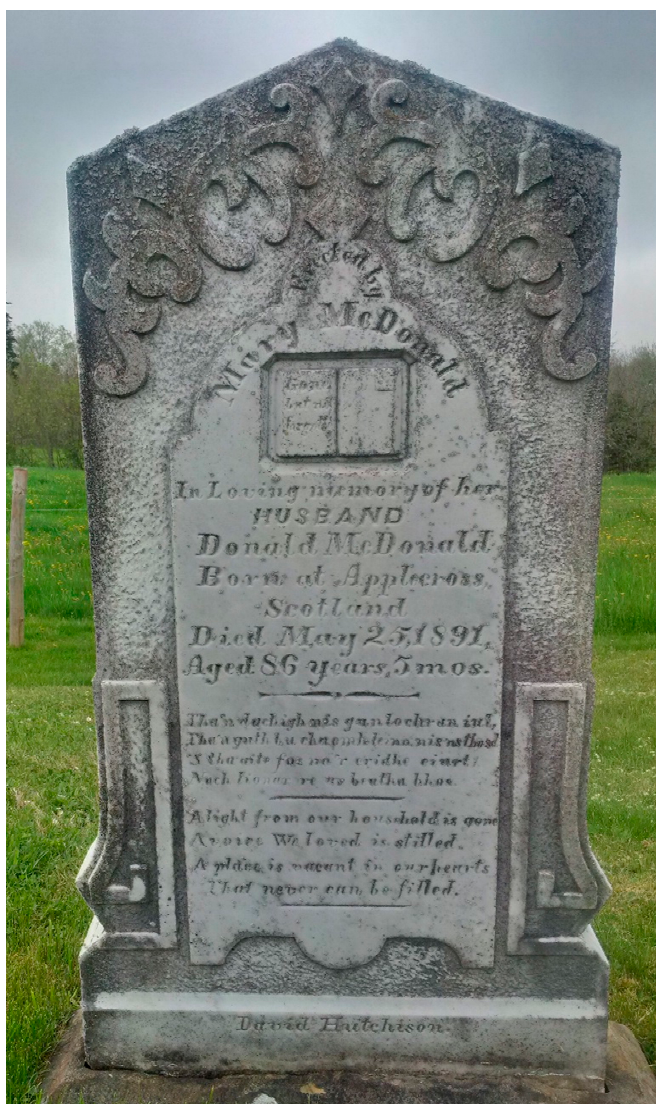

Figure 5

Erected by  
Mary McDonald  
Gone but not forgotten  
In loving memory of her  
HUSBAND  
Donald McDonald  
Born at Applecross,  
Scotland  
Died May 25, 1891.  
Aged. 86 years, 5 mos.

-----  
*Tha'n dachigh [sic] nis gun lochan iul,  
Tha'n guth bu chaomh leinn nis na thosd.  
'S tha aite fas na 'r cridhe ciurt.  
Nach lionar re ar beatha bhos.*

-----  
A light is from our household gone  
A voice we loved is stilled.  
A place is vacant in our hearts  
That never can be filled.

David Hutchison  
Middle River Cemetery  
Middle River, Victoria County

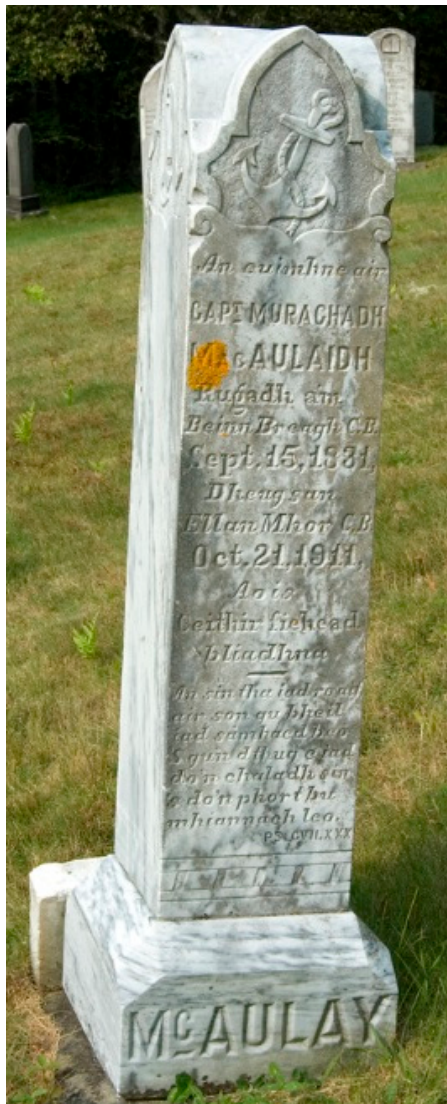

Figure 6 [Credit: Cape Breton Genealogy and Historical Association]

*An cuimhne air* [In memory of]  
 CAPT. MURACHADH  
 MacAULADH  
*Rugadh am* [born in]  
*Beinn Breagh C.B.* [Beinn Bhreagh, CB]  
 Sept. 15, 1831  
*Dheug san* [Died in]  
*Ellan Mhor C.B.* [Big Island, CB]  
 Oct. 24, 1911,  
 Aois [Age]  
*Ceithir fichead*  
*Bliadhna* [80 years]

*An sin tha iad ro ait*  
*airson gu bheil iad samhacd* [sic] *beo*  
*'S gun d thug e iad*  
*do 'n chalachd sin*  
*'s do 'n phort bu*  
*mhiannach leo.*

PS CVILXXX

["Then are they glad because they are  
 quiet; so he brings them to their desired  
 haven." (metrical Psalms 107:30)]

McAULAY

Man O War Point Cemetery  
 Boularderie Island, Victoria County



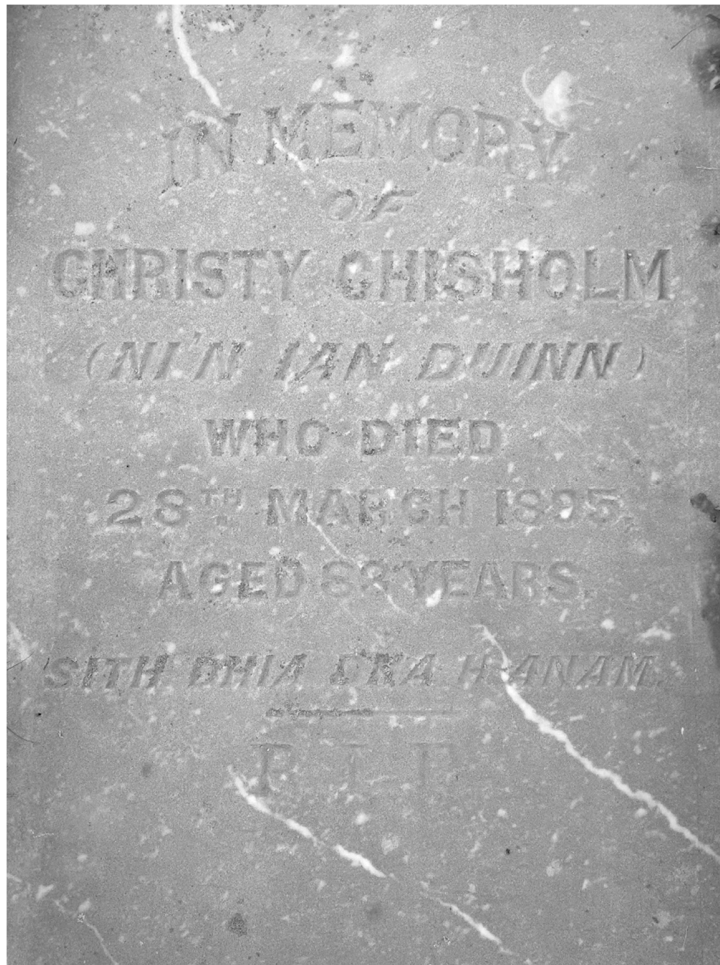

Figure 7

IN MEMORY  
OF  
CHRISTY CHISHOLM  
(NI'N IAN DUINN)  
WHO DIED  
28<sup>th</sup> MARCH 1895  
AGED 88 YEARS  
SITH DHIA [sic] DHA H-ANAM  
[Peace of God to her soul]  
-----  
R I P  
St. Andrew's Old Catholic Cemetery  
St. Andrew's, Antigonish County

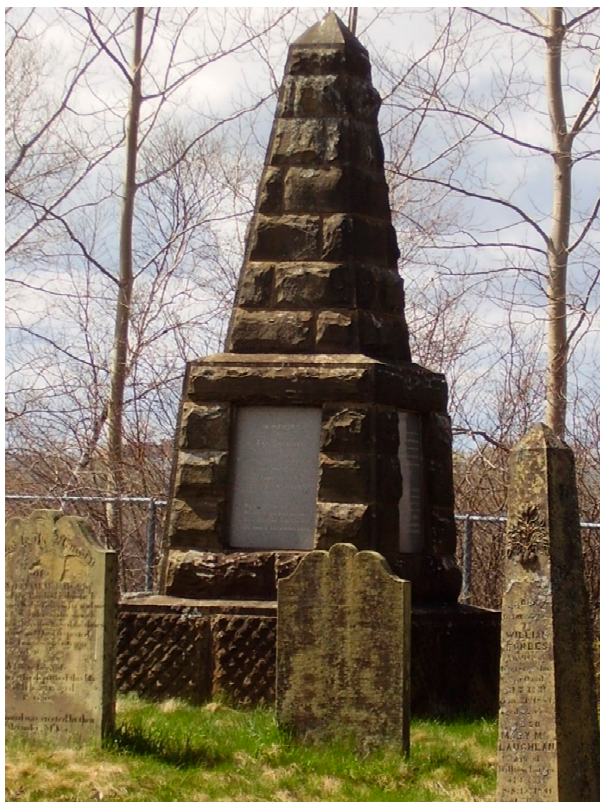

Figure 8

Rev. James MacGregor

d. 3 March 1830

BU BHEAN PHOSDA TLATH I

BU MHATHAIR' BHA CAOIN

BHA CREIDIMH LE GRADH AIC'

US GNATH NACH ROBH FAOIN.

[She was a kind wife

She was a gentle mother

She had faith with love

And a manner not vain.]

MacGregor Cemetery

New Glasgow, Pictou County



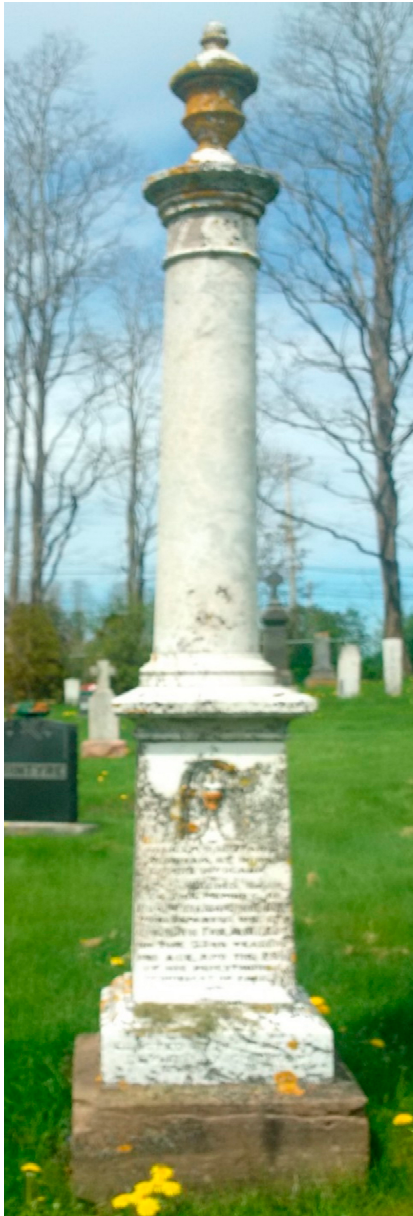

Figure 9

Rev. William Chisholm  
 d. 15 February 1884  
 BHA LAGH NA FIRINN  
 'NA BHEUL AGUS CHA  
 D'FHUAIREADH AIN-  
 GIDHEACHD 'NA BHILIBH:  
 GHLUAIS E LEAMSA ANN  
 AN SITH AGUS ANN AN  
 IONRACAS AGUS PHILL  
 E MORAN AIR FALBH  
 O EUCEART.

[The law of truth was in his mouth, and  
 iniquity was not found in his lips: he  
 walked with me in peace and equity,  
 and did turn many away from iniquity.]

MALACHI II.6

St. Mary's Cemetery  
 Heatherston, Antigonish County

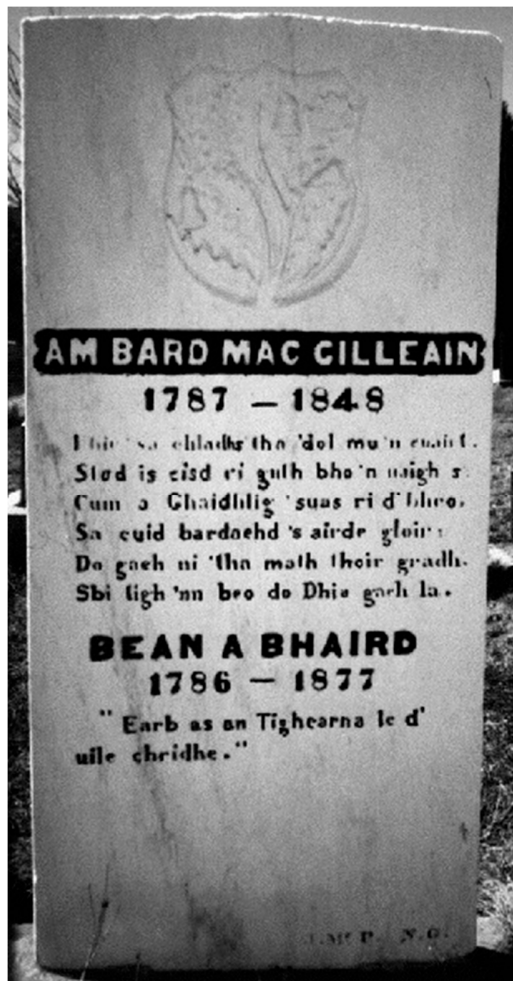

Figure 10 [Credit: Kenneth Nilsen]

#### AM BARD MAC GILLEAIN

1787-1848

Fhir 'sa chladh s' tha 'dol mun cuairt  
Stad is eisd ri guth bhon uaigh s'  
Cum a' Ghaidhlig suas ri d' bheo,  
'S a cuid bardachd 's airde glair;  
Do gach ni tha math thoir gradh,  
'S bi tigh'nn beo do Dhia gach la.

BEAN A BHAIRD

1786-1877

"Earb as an Tighearna le d'  
uile chridhe."

[The Poet MacLean

1787-1848

O man who in this cemetery goes round  
Stop and listen to a voice from this grave.  
Keep up the Gaelic for as long as you live,  
And its poetry of highest glory;  
To each thing that is good, give love,  
And live for God every day.

Wife of the Poet [Isabella Black]

1786-1877

"Trust in the Lord with all your heart."

Proverbs 3:5]

Glen Bard Cemetery

Glen Bard, Antigonish County



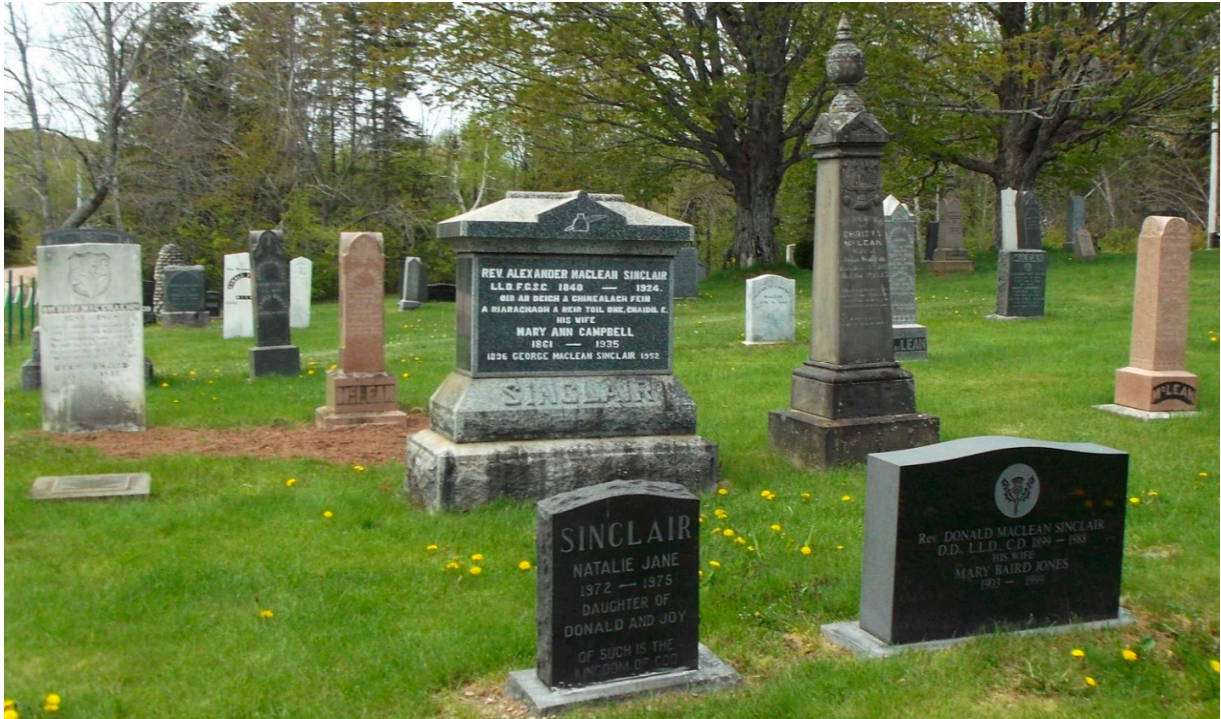

Figure 11

Maclean/Sinclair burials: 4 generations  
Glen Bard Cemetery  
Glen Bard, Antigonish County

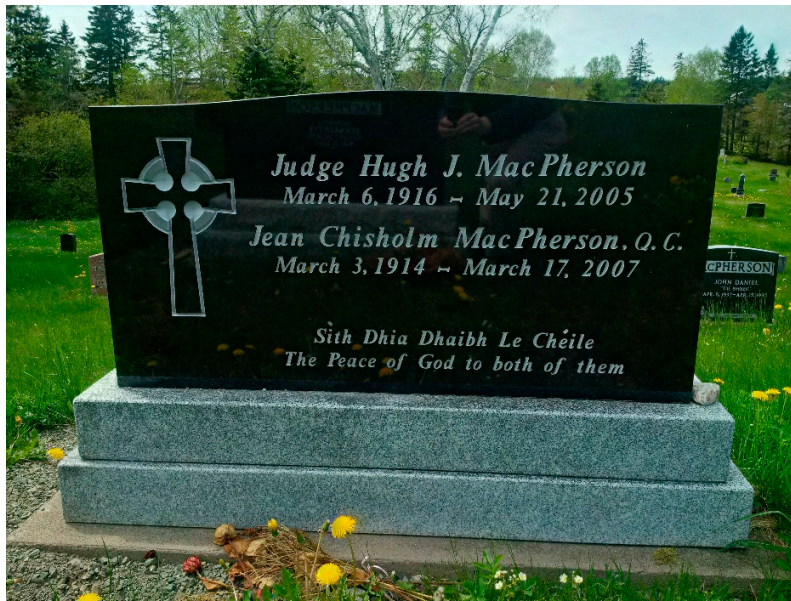

Figure 12

Sìth Dhia [sic] Dhaibh Le Chéile  
The Peace of God to both of them  
South River Cemetery  
St. Andrew's, Antigonish County

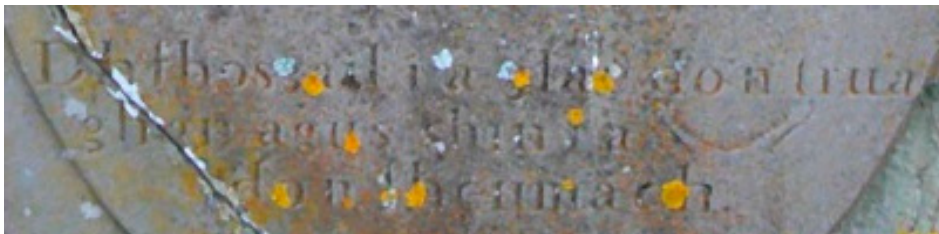

Figure 13

Dh fhosgail i a glac do n trua[-]  
ghan agus shin i a [làmh]an  
do n fheumach.  
[She opened her hand to the poor,  
and she stretched out her arms to the  
needy. (Proverbs 31:20)]  
St. Margaret of Scotland Cemetery  
Arisaig, Antigonish County



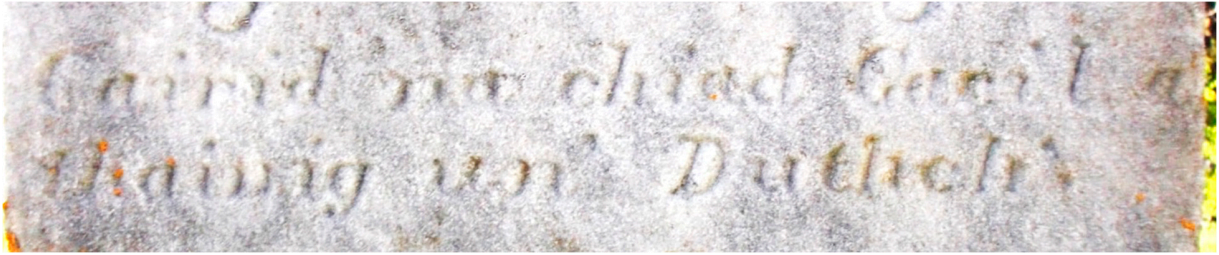

Figure 14

*Cairid na chiad Gaeil a  
Thainig un' Duthch'.*  
[A friend of the first Gaels/Highlanders who  
came to the country.]  
St. Andrews Cemetery  
Egerton, Pictou County

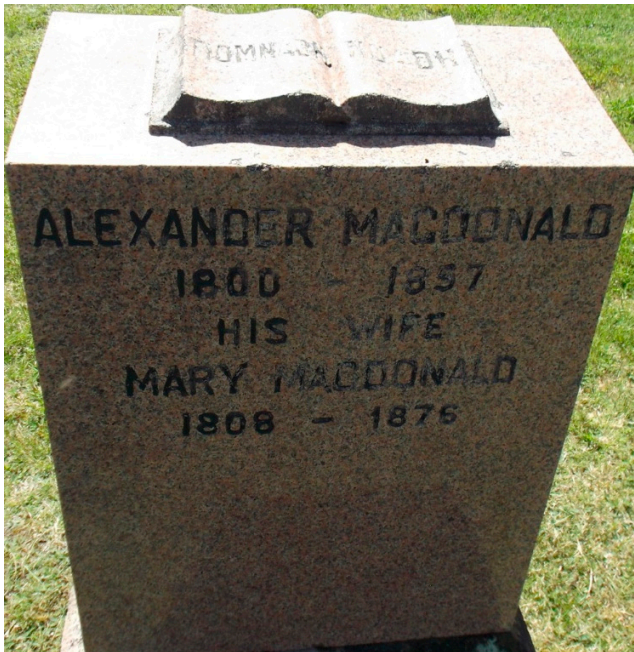

Figure 15

Tiomnadh Nuadh  
[New Testament]  
Stewartdale Cemetery  
Whycocomagh, Inverness County

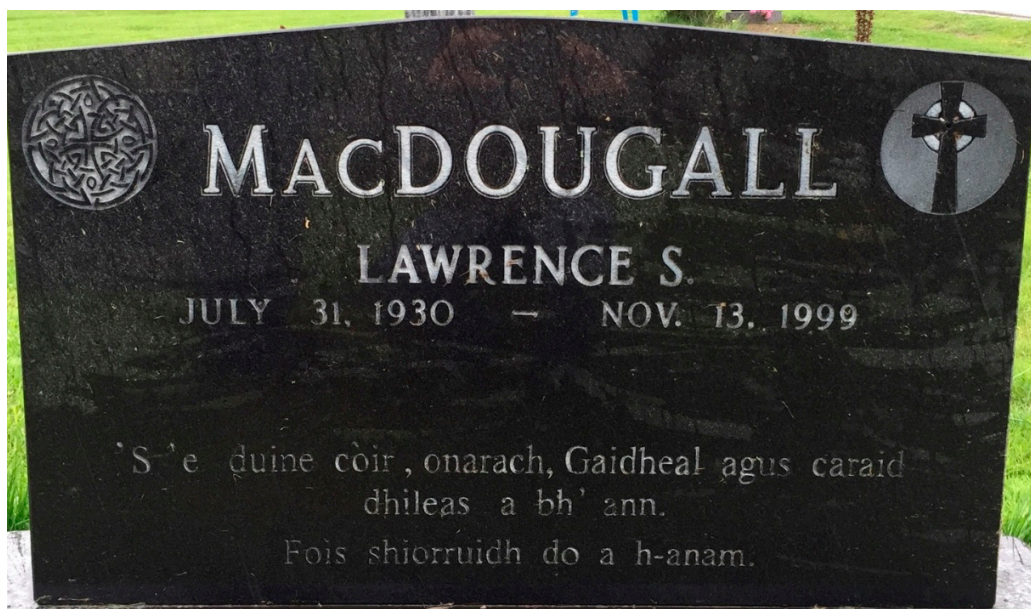

Figure 16

‘S’ e [sic] duine coir, onarach, Gaidheal agus caraid  
dhileas a bh’ ann.

Fois shiorruidh do a h-anam [sic].

[He was decent, honorable, a Gael/Highlander and a loyal  
friend. Rest eternal to her [sic] soul.]

Our Lady of Lourdes Cemetery  
Stellarton, Pictou County

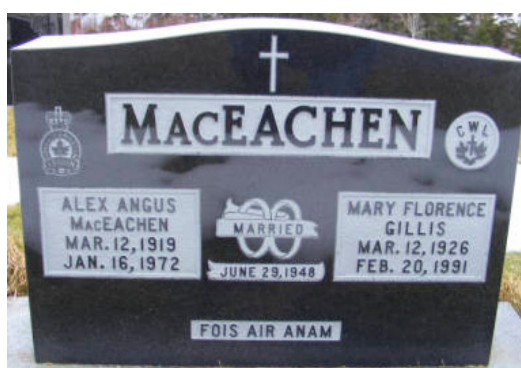

Figure 17

FOIS AIR ANAM [Peace on his [sic] soul]

St. Mary's Roman Catholic Cemetery  
Mabou, Inverness County

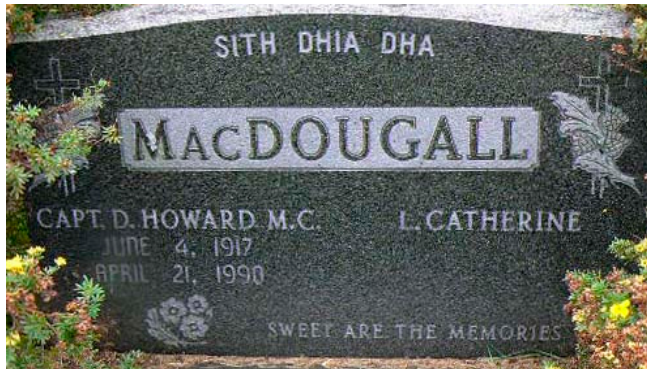

Figure 18

SITH DHIA [sic] DHA [Peace of God to him (or her)]  
St. Ninian's Cemetery  
Antigonish, Antigonish County

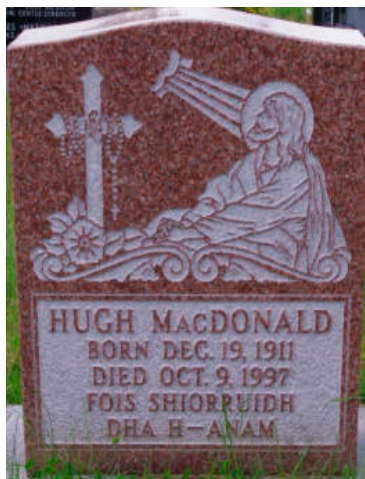

Figure 19

FOIS SHIORRUIDH  
DHA H-ANAM  
[Eternal Peace to her [sic] soul]  
St. Mary of the Angels Cemetery  
Glendale, Inverness County

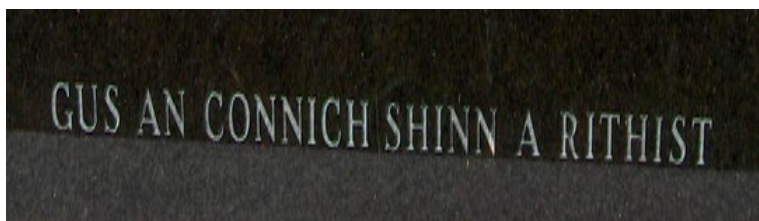

Figure 20

GUS AN CONNICH SHINN [sic] A RITHIST [Until we meet again]  
Goose Cove Cemetery  
St. Ann's Bay, Goose Cove, Victoria County



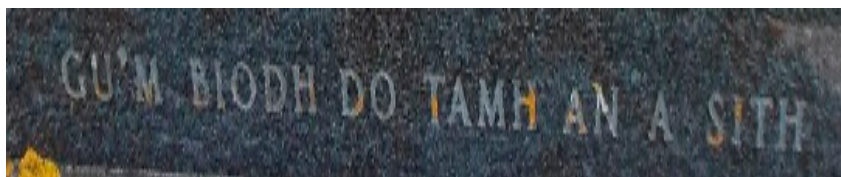

Figure 21

GUM BIODH DO TAMH [sic] AN A [sic] SITH [May your rest be in peace]  
St. Columba (New Section) Cemetery  
Iona, Victoria County

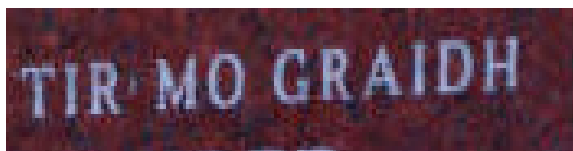

Figure 22

TIR MO GRAIDH [sic]  
[Land of my love]  
St. Andrew's Cemetery  
Judique, Inverness County

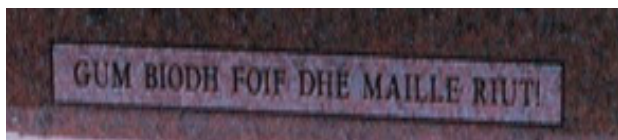

Figure 23

GUM BIODH FOIF [sic] DHE MAILLE RIUT  
[May the peace of God be with you]  
St. Mary's Roman Catholic Cemetery  
Mabou, Inverness County

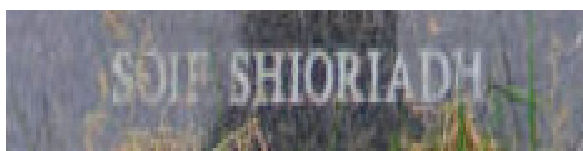

Figure 24

SOIF SHIORIADH [sic] [Eternal peace]  
St. Mary's Roman Catholic Cemetery  
Mabou, Inverness County

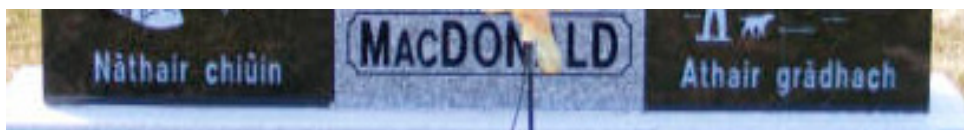

Figure 25

Nàthair [sic] chiùin [Gentle mother] Athair gràdhach [Loving father]  
St. Mary's Roman Catholic Cemetery  
Mabou, Inverness County

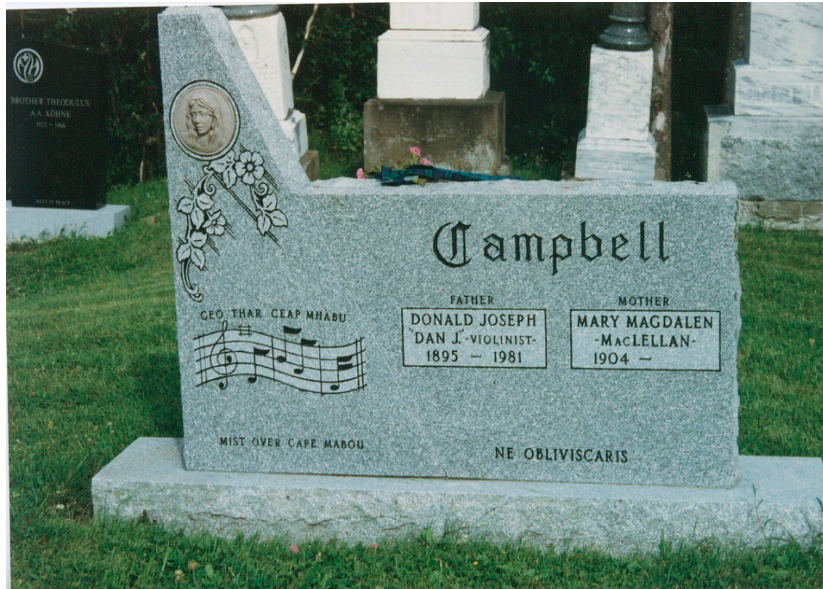

Figure 26

CEO THAR CEAP  
MHABU / MIST OVER  
CAPE MABOU  
[A tune by the deceased,  
well-known fiddler Dan J.  
Campbell from Glenora  
Falls near Mabou.]  
St. Mary's Roman Catholic  
Cemetery  
Mabou, Inverness County

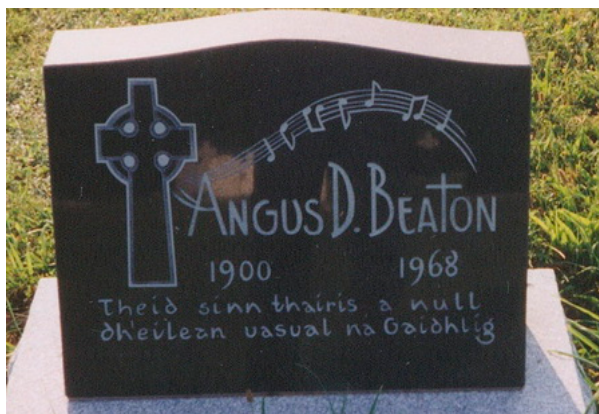

Figure 27

Theid sinn thairis a null  
dh'eilean uasal na Gaidhlig  
[We will go across to the noble island of  
Gaelic From: "Togail cùrs air Leòdhas"]  
St. Mary's Roman Catholic Cemetery  
Mabou, Inverness County

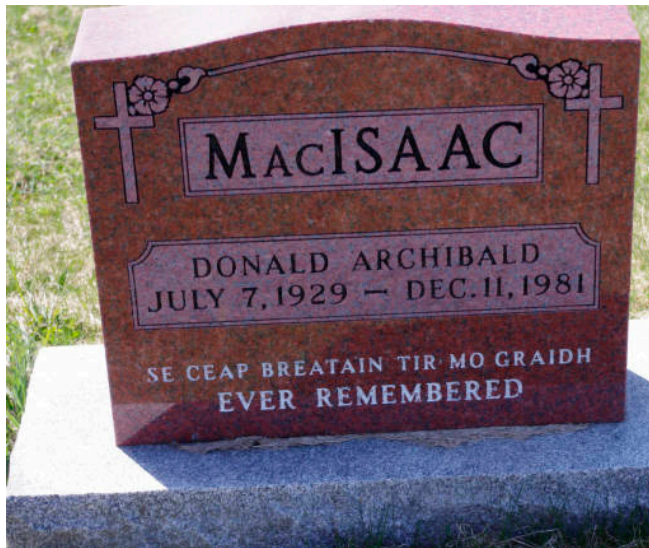

Figure 28

SE CEAP BREATAIN TIR MO GRAIDH

[sic]

[Cape Breton is the land of my love.

From: "Òran do Cheap Breatainn"]

St. Andrew's Cemetery

Judique, Inverness County

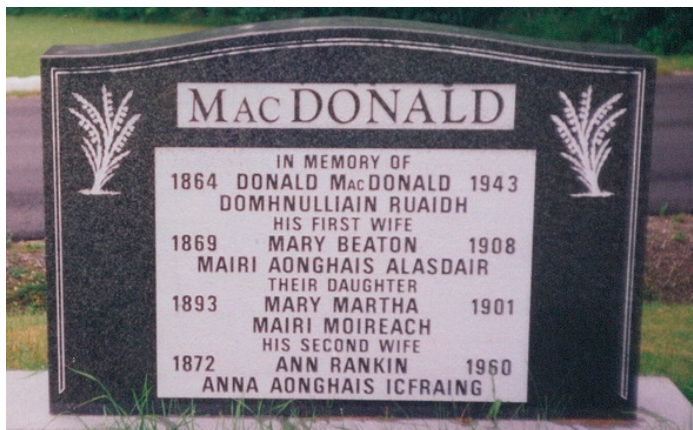

Figure 29 [Credit: Cape Breton Genealogy and Historical Association]

DOMHNULL IAIN RUaidH [Donald,  
Red-haired John's son]

MAIRI AONGHAIS ALASDAIR [Mary,  
daughter of Angus son of Alexander]

MAIRI MOIREACH [Mary Martha]

ANNA AONGHAIS ICFHRAINING [Ann  
Rankin, Angus's daughter]

St. Mary's Roman Catholic Cemetery

Mabou, Inverness County



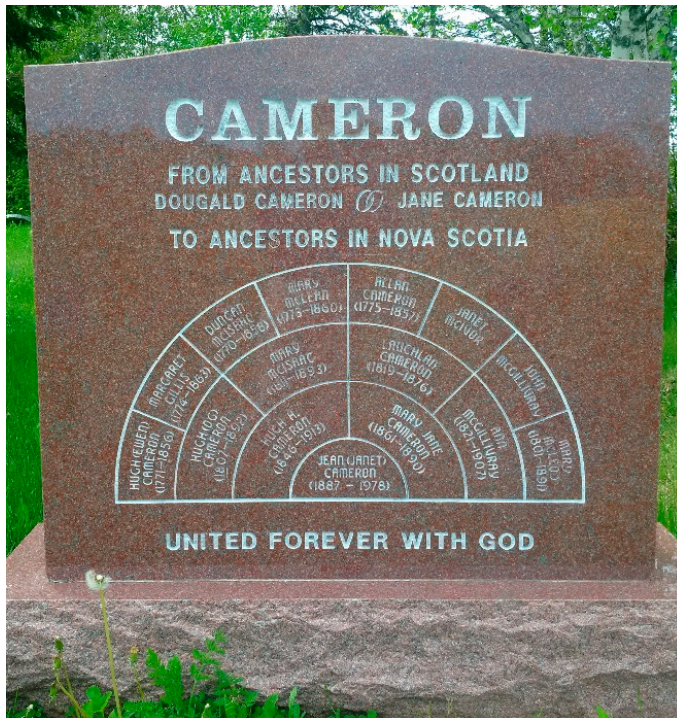

South River Cemetery  
St. Andrew's, Antigonish County

Figure 30

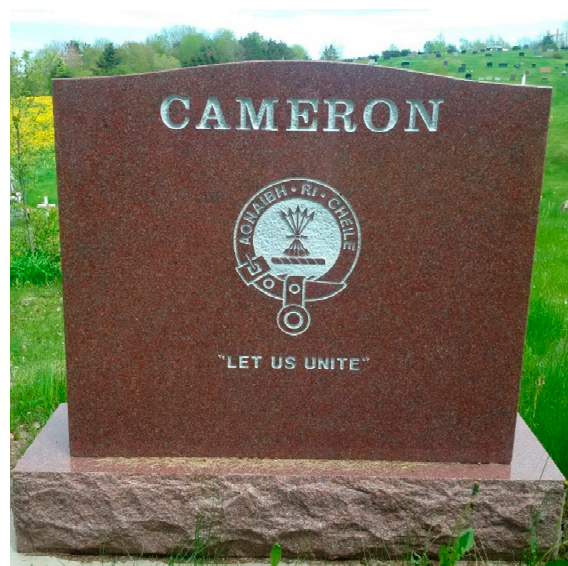

South River Cemetery  
St. Andrew's, Antigonish County

Figure 31

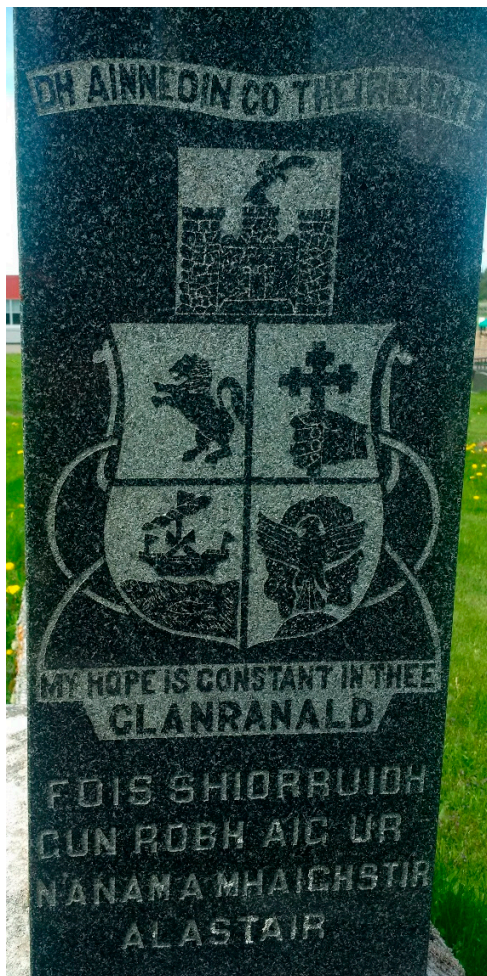

Figure 32

DH'AINDEOIN CO THEIREADH E

[Despite who would say it]

HOPE IS CONSTANT IN THEE

CLANRANALD [Macdonald of

Clanranald slogan]

FOIS SHIORRUIDH

GUN ROBH AIG UR

N'ANAM A MHAIGHSTIR

ALASTAIR.

[May your soul have eternal rest Father

Alexander.]

St. Andrew's Cemetery

St. Andrew's, Antigonish County

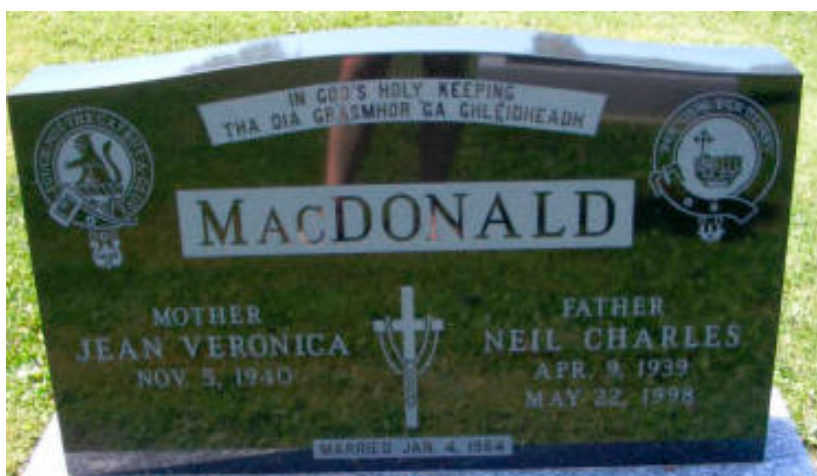

Figure 33

THA DIA GRÀSMHOR 'GA  
GHLÉIDHEADH [Gracious God is  
keeping him [sic]]

St. Mary's Roman Catholic Cemetery

Mabou, Inverness County
